# Supplementary material for: Extreme heat changes post-heat wave community reassembly
Source: PubMed Central journal article supplement (PMC4461416; doi:10.1002/ece3.1490), 2015-05-06
Supplement: ece30005-2140-sd1.pdf [file ece30005-2140-sd1.pdf]

## **Extreme heat changes post-heatwave community reassembly**

Running head: Extreme heat alters community recovery

Linda I. Seifert<sup>1\*</sup>, Guntram Weithoff<sup>1</sup>, and Matthijs Vos<sup>2,3</sup>

<sup>1</sup>Department of Ecology and Ecosystem Modelling, Potsdam University, Maulbeerallee 2,  
14469 Potsdam, Germany

<sup>2</sup> Department of Conservation Biology, Institute of Environmental Sciences (CML), Leiden  
University, PO Box 9518, 2300 RA Leiden, the Netherlands

<sup>3</sup> Working Group Zoological Biodiversity, Ruhr-Universität Bochum, Universitätsstr. 150 /  
Gebäude ND05, D-44780 Bochum, Germany

\*Corresponding author:

[linda.seifert@uni-potsdam.de](mailto:linda.seifert@uni-potsdam.de)

Phone: +49(0)176 32094379

Fax: +49(0)331 977 1948

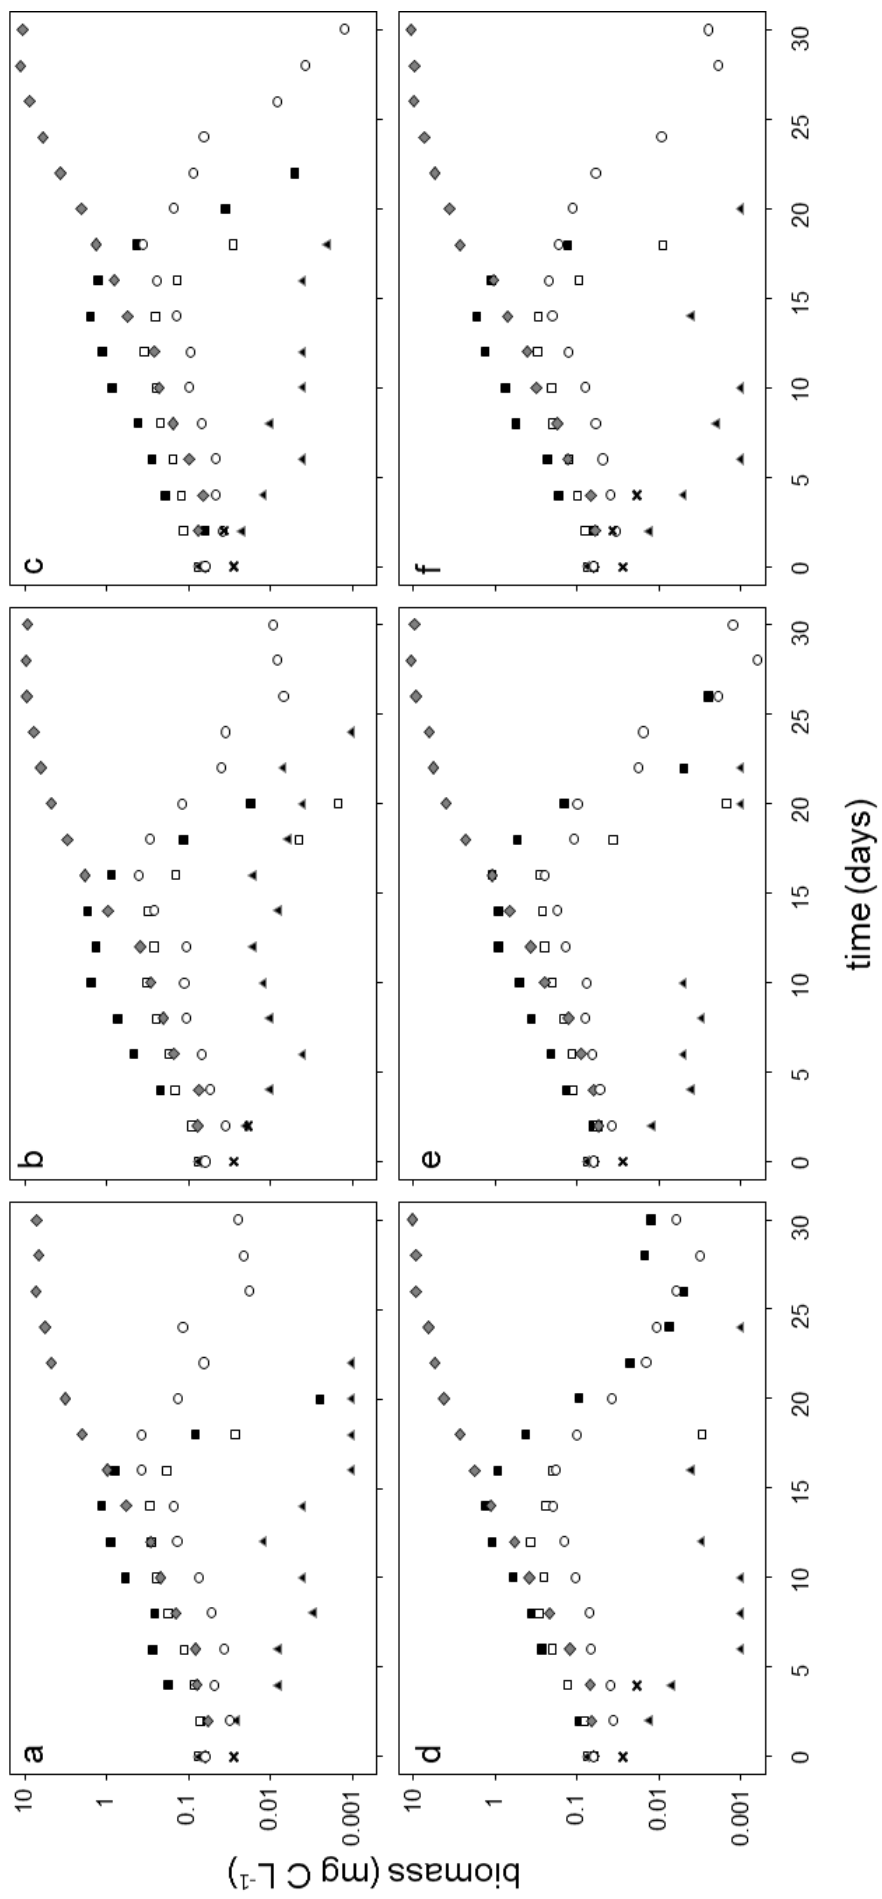

**Fig. S1:** Control rotifer communities at 15°C. Replicates a – f. Mean biomass ( $\pm$ SE) are expressed in mg C L<sup>-1</sup>. Species are *Brachionus calyciflorus* (closed squares), *B. havanaensis* (open squares), *Cephalodella* (grey diamonds), *Lecane* (open circles), *Keratella* (grey triangles) and *Asplanchna* (crosses).

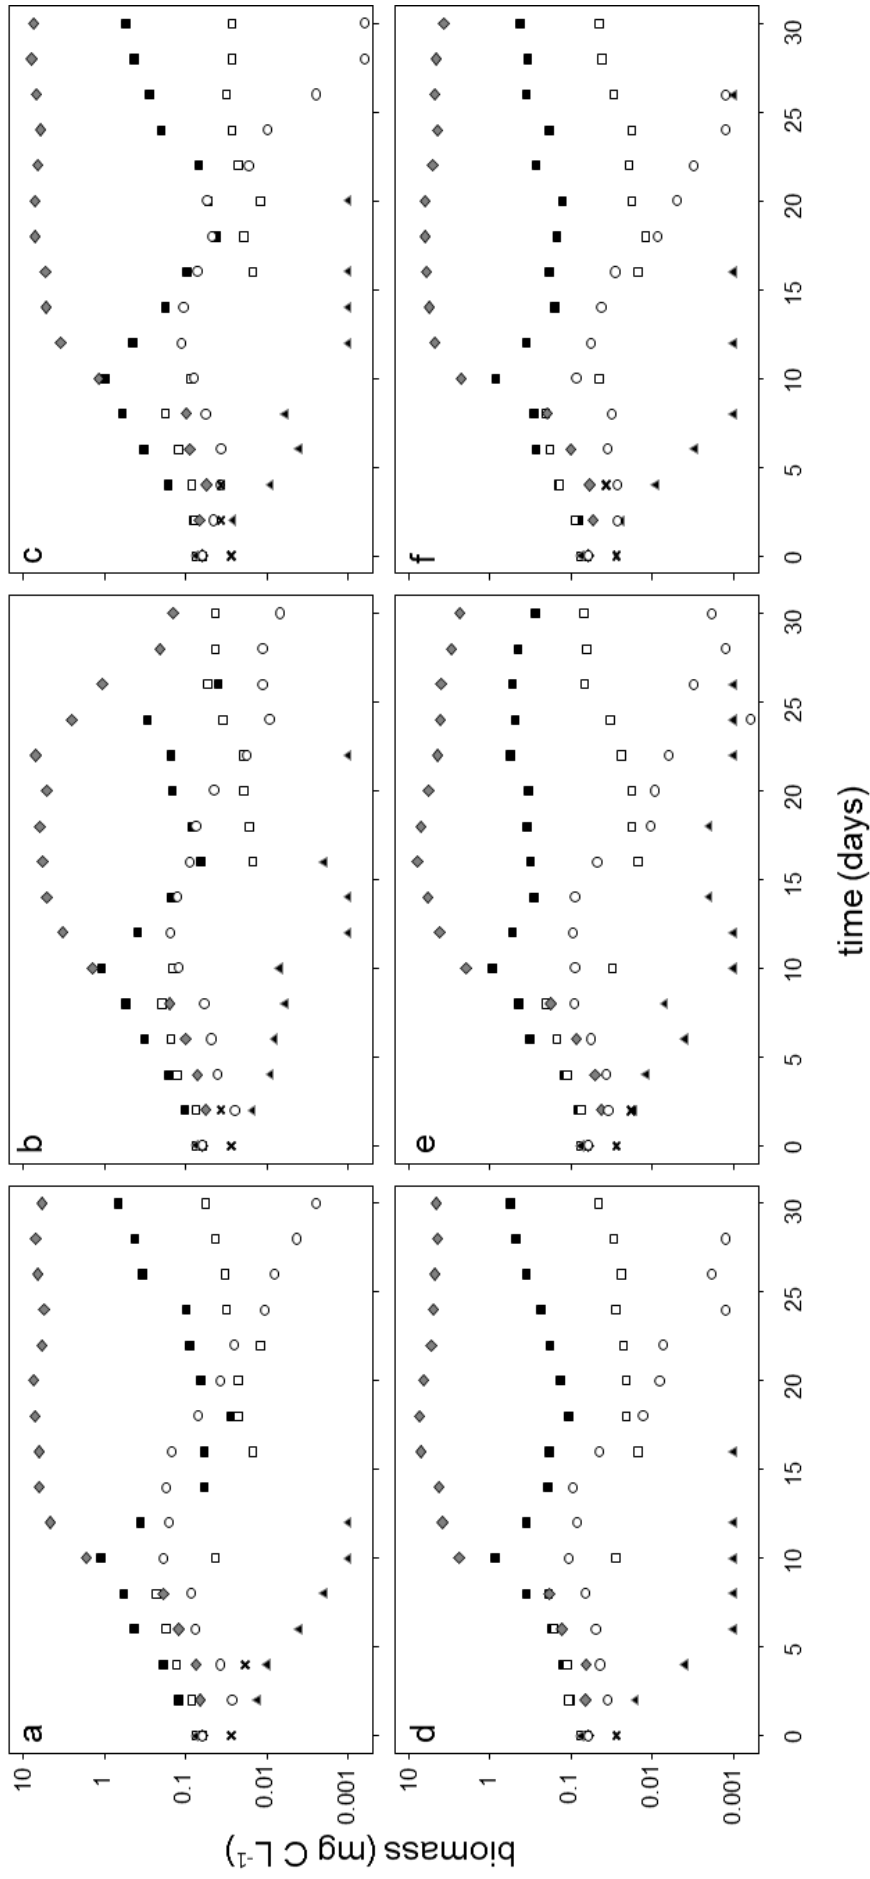

**Fig. S2:** Rotifer communities of the 29°C heat wave treatment. Replicates a – f. Heat waves started at day 8 and ended at day 10. Lost species were re-introduced at day 16. Mean biomass ( $\pm$ SE) are expressed in mg C L<sup>-1</sup>. Species are *Brachionus calyciflorus* (closed squares), *B. havanaensis* (open squares), *Cephalodella* (grey diamonds), *Lecane* (open circles), *Keratella* (grey triangles) and *Asplanchna* (crosses).

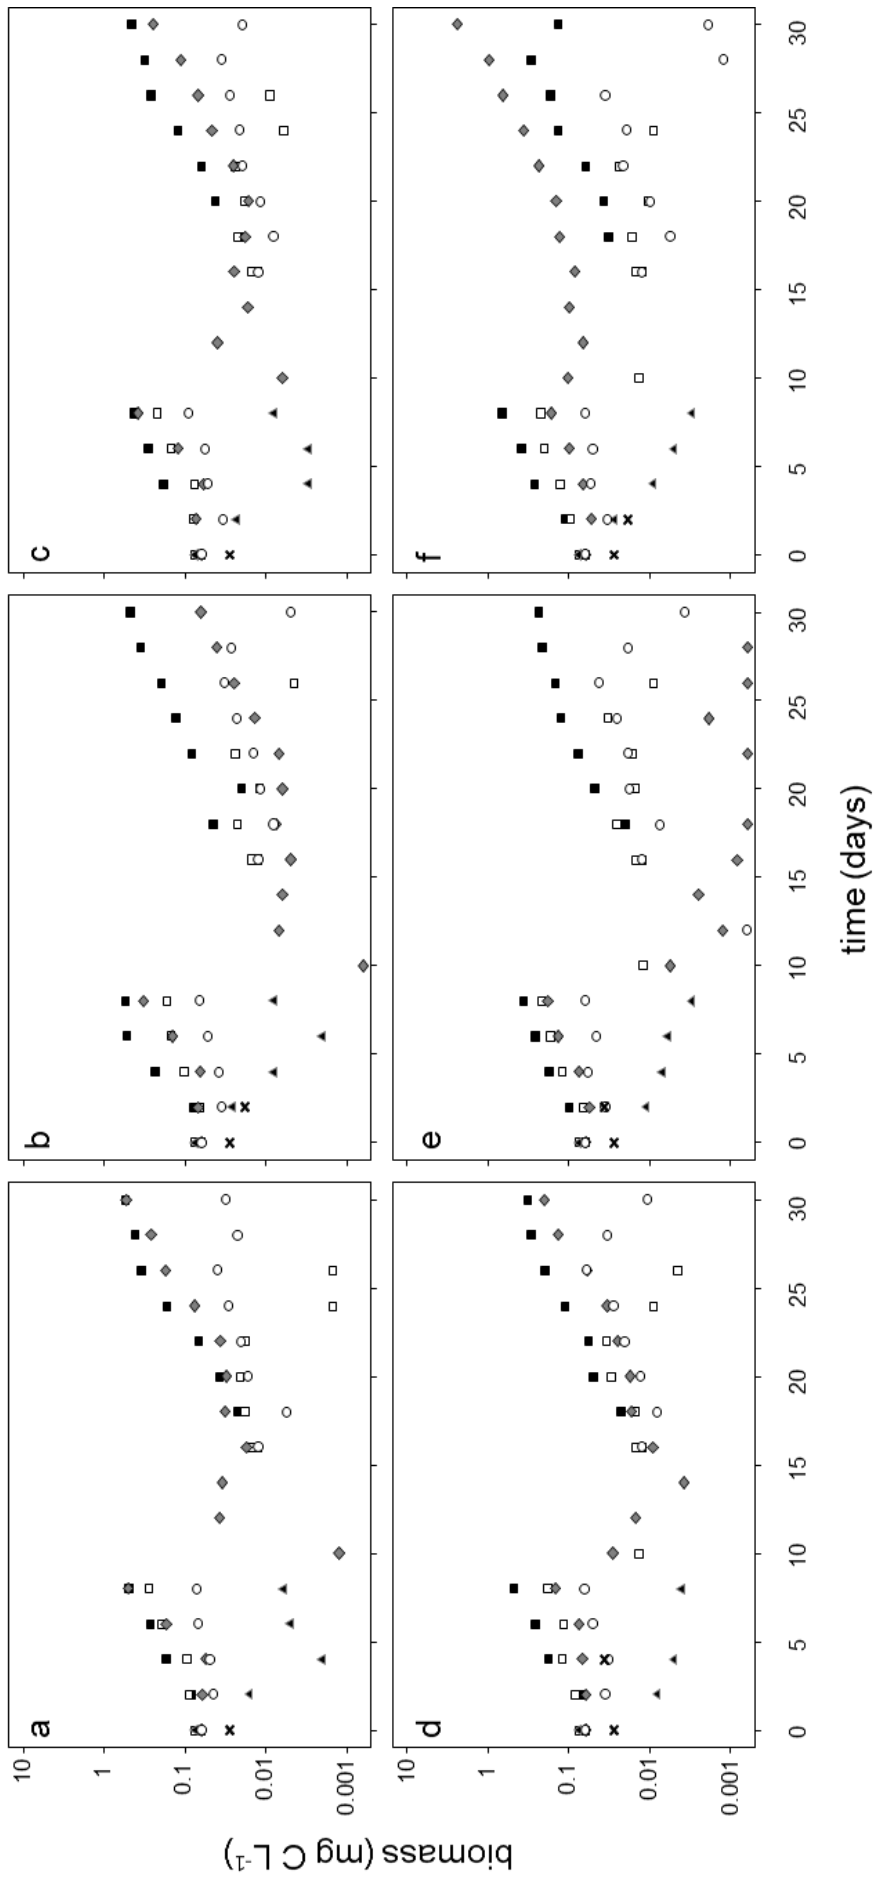

**Fig. S3:** Rotifer communities of the 39°C heat wave treatment. Replicates a – f. Heat waves started at day 8 and ended at day 10. Lost species were re-introduced at day 16. Mean biomass (±SE) are expressed mg C L<sup>-1</sup>. Species are *Brachionus calyciflorus* (closed squares), *B. havanaensis* (open squares), *Cephalodella* (grey diamonds), *Lecane* (open circles), *Keratella* (grey triangles) and *Asplanchna* (crosses).

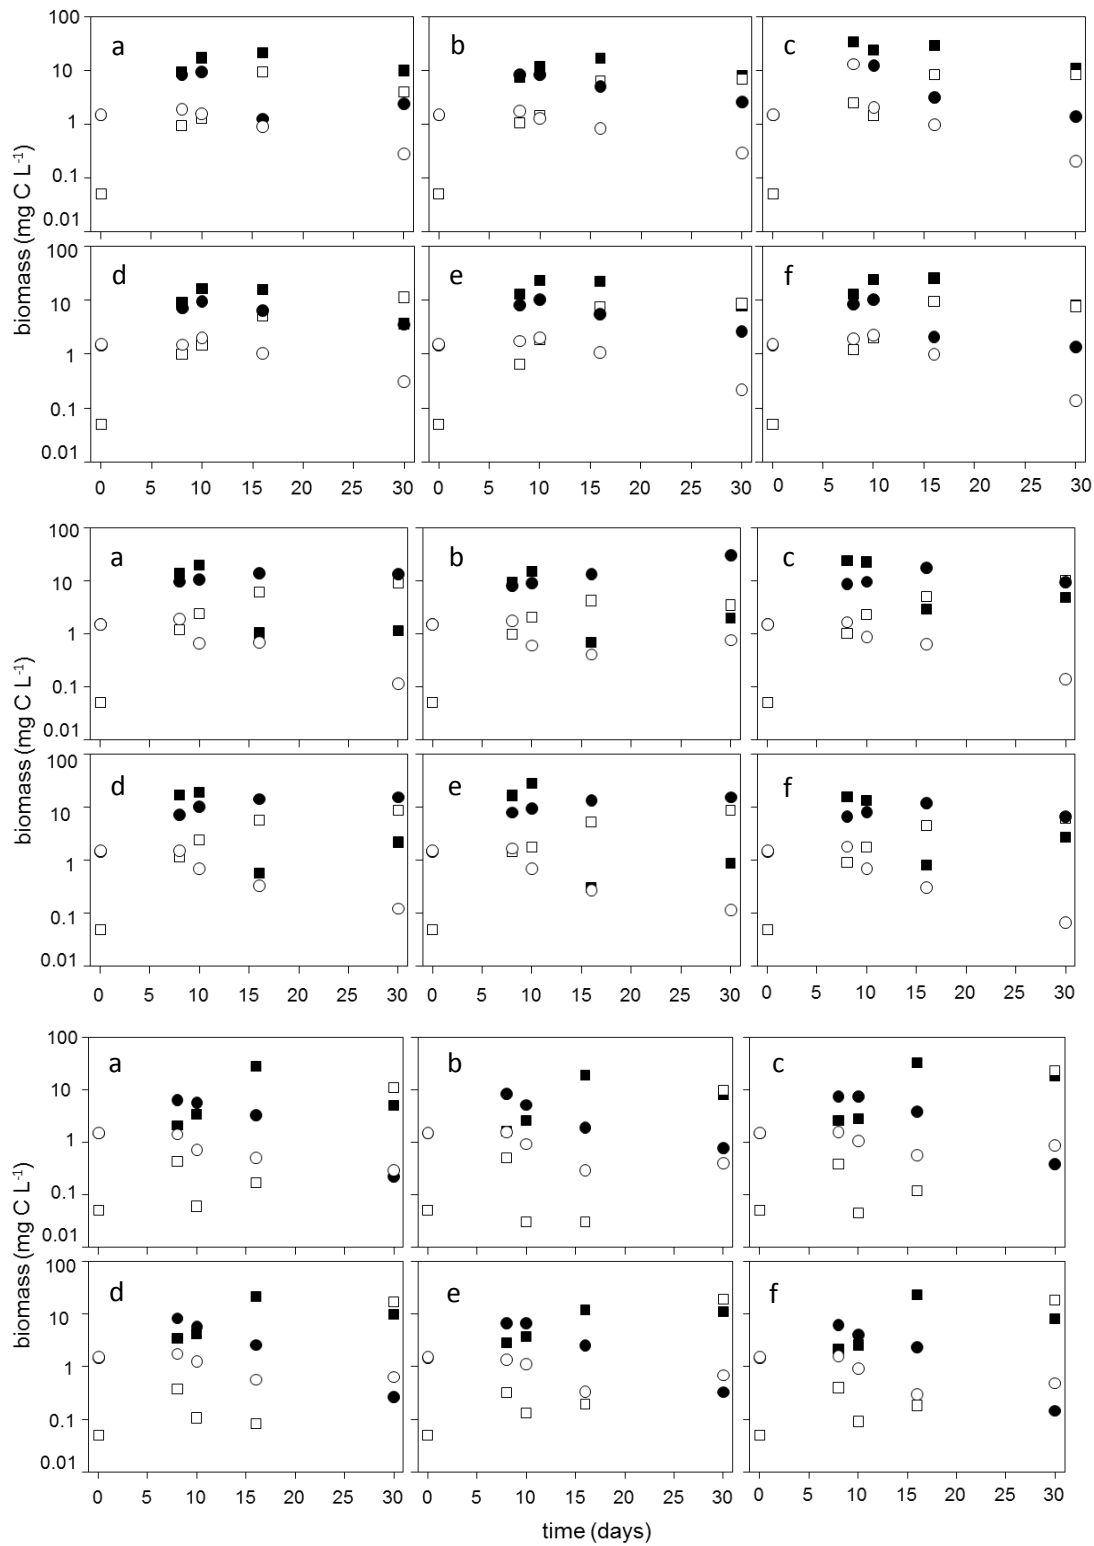

**Fig. S4:** Algal communities of (top) the control, (middle) the 29°C heat wave and the (bottom) 39°C heat wave treatment. Replicates a – f. Heat waves started at day 8 and ended at day 10. Species are *Monoraphidium* (closed circles), *Nannochloropsis* (open circles), *Chlamydomonas* (closed squares), Chrysophyte (open squares).
